# Supplementary material for: High-silica, heulandite-type zeolites prepared by direct synthesis and topotactic condensation
Source: Royal Society of Chemistry journal article supplement (doi:10.1039/c5ta02354h), 2015-01-01

## High-Silica, Heulandite-Type Zeolites Prepared by Direct Synthesis and Topotactic Condensation

Joel E. Schmidt<sup>a</sup>, Dan Xie<sup>b</sup> and Mark E. Davis<sup>\*a</sup>

<sup>a</sup>Chemical Engineering, California Institute of Technology, Pasadena, CA 91125, USA. Email: mdavis@cheme.caltech.edu

<sup>b</sup>Chevron Energy Technology Company, Richmond, CA 94802, USA.

Deconvolution of CIT-8 <sup>29</sup>Si MAS NMR.

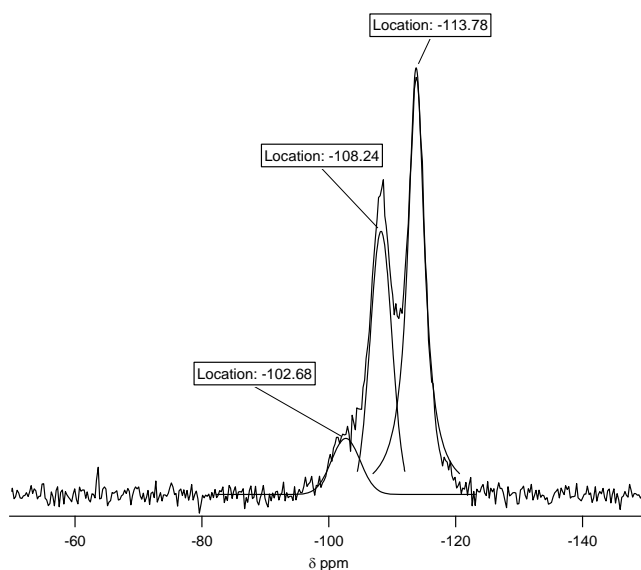

| Peak location | Normalized Area | Coordination              |
|---------------|-----------------|---------------------------|
| -113.78       | 1.00            | Si(OSi) <sub>4</sub>      |
| -108.24       | 0.54            | Si(OAl)(OSi) <sub>3</sub> |
| -102.68       | 0.15            | Si(OAl)(OSi) <sub>3</sub> |

The Si/Al ratio was found to be 9.8.

Deconvolution of the CIT-8  $^{29}\text{Si}$  MAS NMR including a  $\text{Si}(\text{OAl})_2(\text{OSi})_2$  resonance that was found to be insignificant

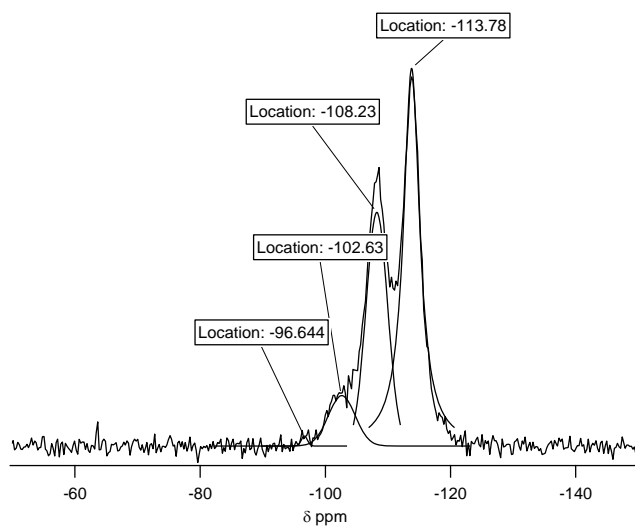

| Peak location | Normalized Area | Coordination                            |
|---------------|-----------------|-----------------------------------------|
| -113.78       | 1.00            | $\text{Si}(\text{OSi})_4$               |
| -108.23       | 0.545           | $\text{Si}(\text{OAl})(\text{OSi})_3$   |
| -102.63       | 0.147           | $\text{Si}(\text{OAl})(\text{OSi})_3$   |
| -96.644       | 0.007           | $\text{Si}(\text{OAl})_2(\text{OSi})_2$ |

The Si/Al ratio was found to be 9.8.

## Silanol Calculation

There are 5 crystallographic unique T sites in **HEU**. T-2 atoms are the only ones exposed to the surface of the layer. The multiplicity of the 5 unique T atoms are:

T1 = 8; **T2 = 8**; T3 = 8; T4 = 8; T5 = 4.

So, ideally, there are **T2** / (T1+T2+T3+T4+T5) = 8/36 = **22.22%** silicon atoms as silanols

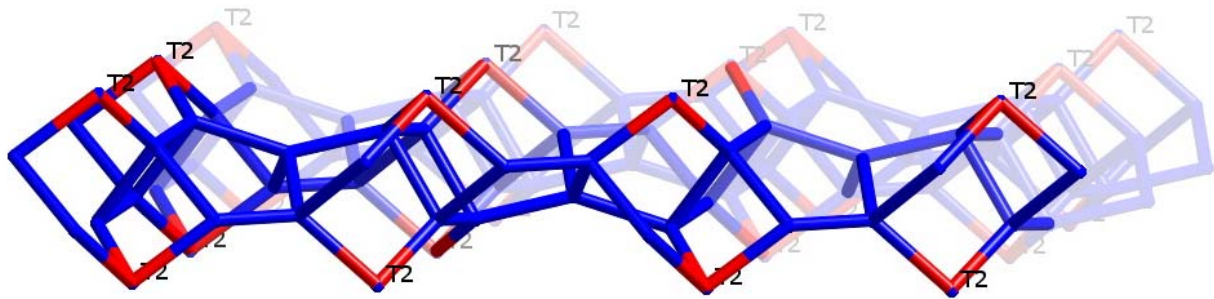

Supplement: c5ta02354h1.pdf [file c5ta02354h1.pdf]
